# Supplementary material
Source: Springer Nature journal article supplement (https://springermedizin.de/resource/supplementary/12995_2011_218_MOESM3_ESM.pdf/9622964)

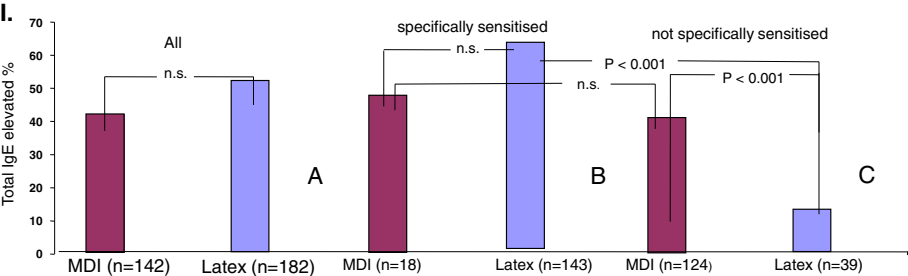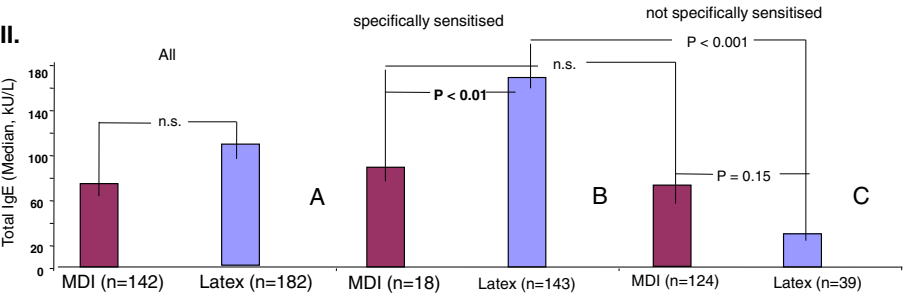

Supplement: MOESM3 [file 9622964]
